# Supplementary material for: Development and Field Evaluation of Near-Isogenic Lines of GR2-EBRRI dhan29 Golden Rice
Source: Frontiers journal article supplement (doi:10.3389/fpls.2021.619739), 2021-02-25

Supplementary Figure 1

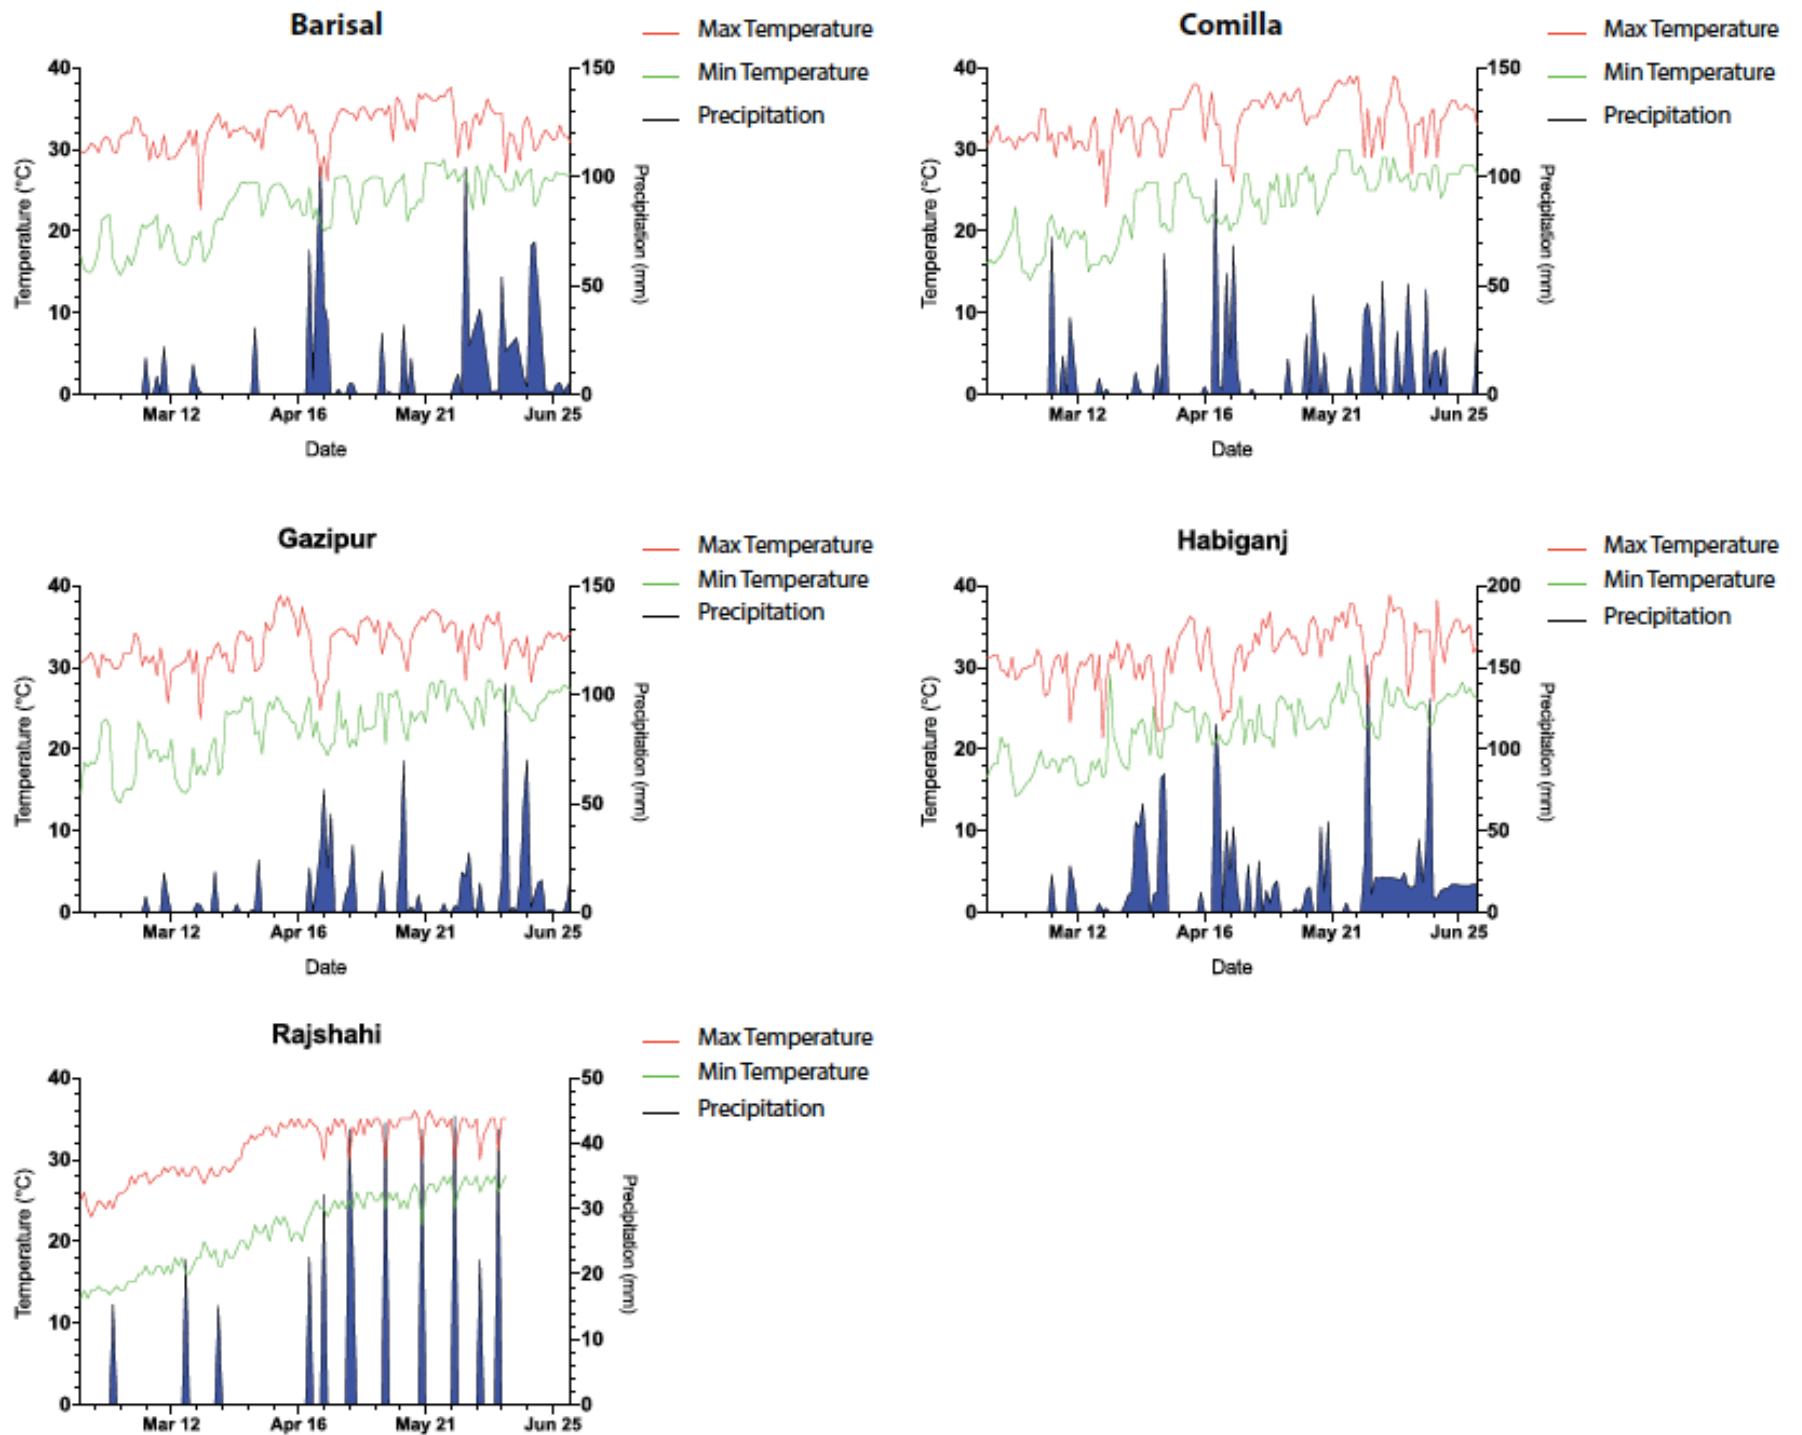

Supplement: Data_Sheet_1.PDF [file Data_Sheet_1.PDF]
